# Supplementary material
Source: publisher figshare collection journal article supplement (https://frontiersin.figshare.com/ndownloader/files/17471414)
Supplement: Supplementary file [file 17471414]

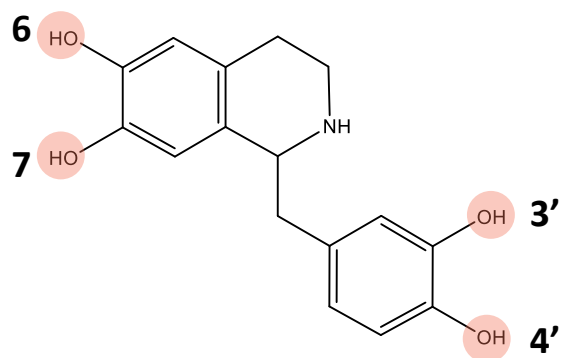

1-Benzylisoquinoline  
(Norlaudanosoline)

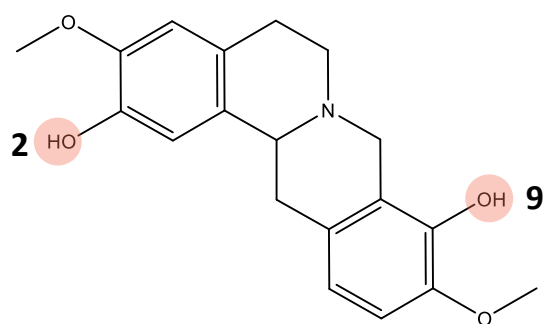

Protoberberine  
(Scoulerine)

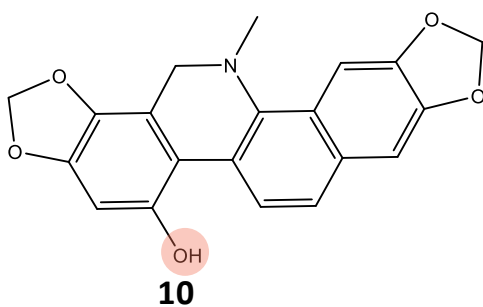

Benzo[c]phenanthridine  
(10-hydroxydihydrosanguinarine)

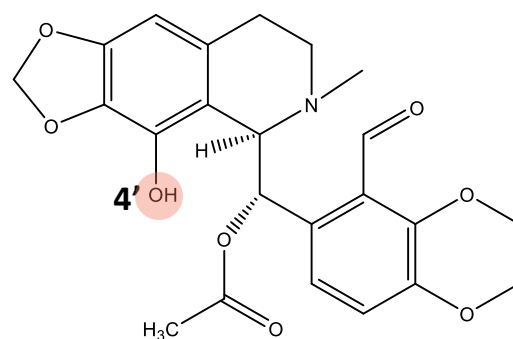

Pthalideisoquinoline  
(4'-O-desmethyl-3-O-acetylpapaveroxine)

**Supplementary Figure 4. Position of hydroxyl groups targeted by BIA *O*-methyltransferases.** Corresponding enzymes are listed in Supplementary Table 1.
